# Supplementary material
Source: publisher figshare collection journal article supplement (https://frontiersin.figshare.com/ndownloader/files/24100793)
Supplement: Supplementary file 1 [file 24100793]

## Supplementary Material

### Micro-chemical investigation of long-term buried gilded and silvered artefacts from ancient Peru

Gabriel M. Ingo<sup>1\*</sup>, Monica Albini<sup>1</sup>, Angel D. Bustamante<sup>2</sup>, Sandra del Pilar Zambrano Alva<sup>2</sup>, Arabel Fernandez<sup>3</sup>, Chiara Giuliani<sup>1</sup>, Elena Messina<sup>1</sup>, Marianna Pascucci<sup>1</sup>, Cristina Riccucci<sup>1</sup>, Paola Staccioli<sup>1</sup>, Gabriella Di Carlo<sup>1</sup> and Luca Tortora<sup>4</sup>

<sup>1</sup> Institute for the study of nanostructured materials, National Research Council, Rome 1 Research Area-Montelibretti, via Salaria km 29.3, 00015 Monterotondo, Rome, Italy

<sup>2</sup> Departamento Académico de Física del Estado Sólido, Universidad Nacional Mayor de San Marcos, Lima Peru

<sup>3</sup> Museo Señora de Cao and Fundacion Wiese, Trujillo, Peru

<sup>4</sup> Surface Analysis Laboratory, INFN & Department of Mathematics and Physics, Roma Tre University, via della Vasca Navale 84, 00146 Rome, Italy

\* Corresponding author: gabrielmaria.ingo@cnr.it

**Special Section:** This article was submitted to Environmental Materials, a section of the journal Frontiers in Materials

**Research Topic:** Nanoscience and Nanomaterials for the Knowledge and Conservation of Cultural Heritage

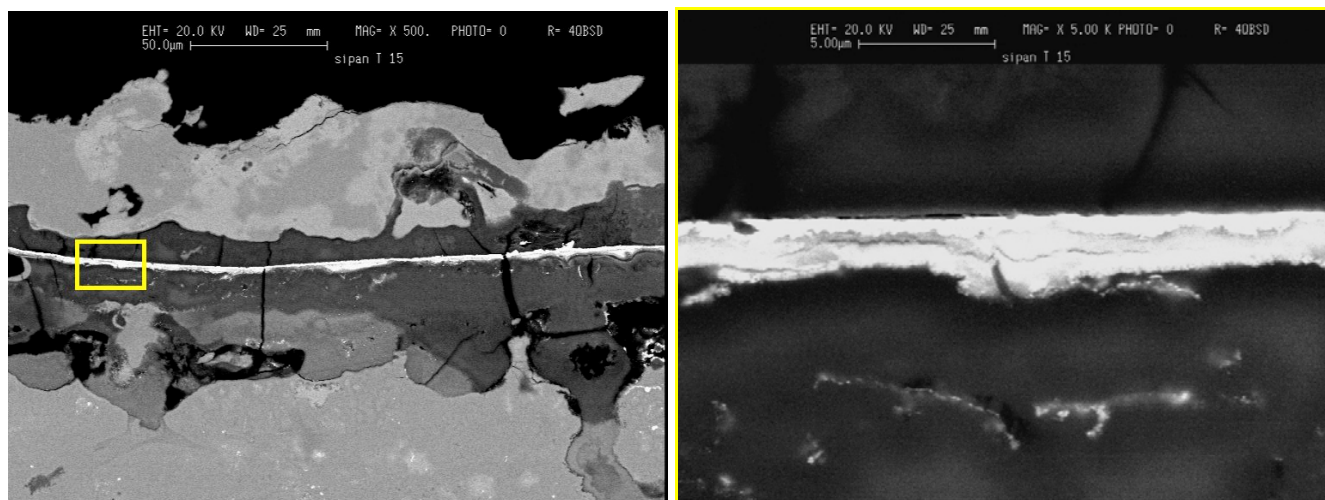

**FIGURE S1** | SEM BSE images of a cross-sectioned fragment of a gilded semicircular diadem completely mineralised (tomb T15 of a young warrior, Sipán). The image on the right is the magnification of the area evidenced by a yellow rectangle. The BSE SEM image on the right allows to measure the thickness of the gilding layer that in this area ranges from 2 to 3  $\mu\text{m}$ .

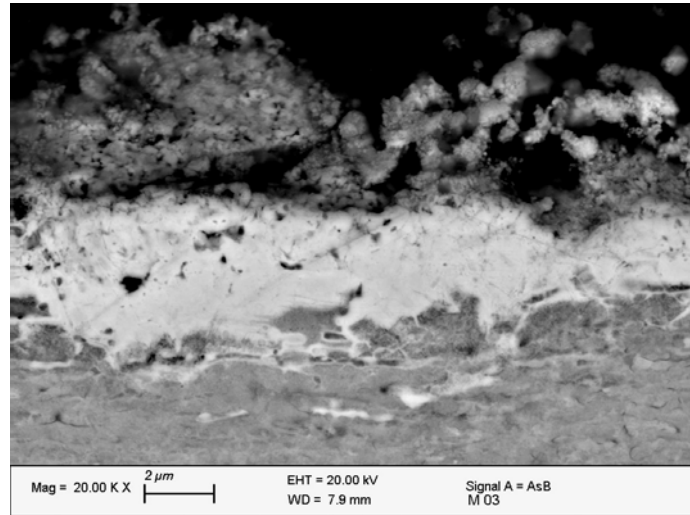

**FIGURE S2** | BSE FE-SEM image of the cross-sectioned fragment of the nariguera F4-03 (tomb of the Lady of Cao) taken in the silvered area (head of the animal on the left, see **Figure 4**).

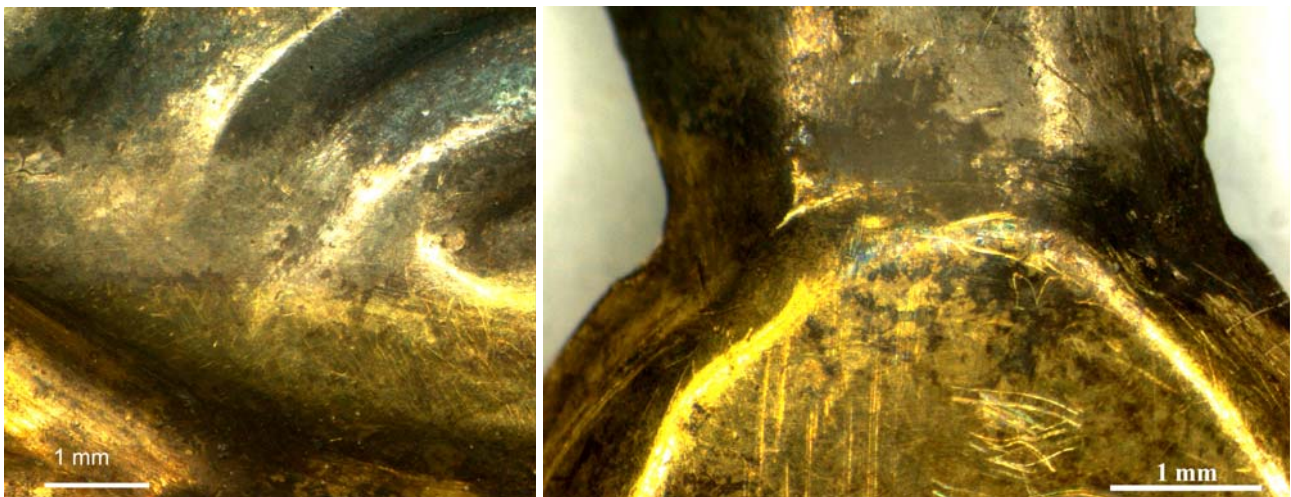

**FIGURE S3** | Optical images of the nariguera F4-03 from the tomb of the Lady of Cao showing the colour change at the interface between the “gold” and the “silver” areas.
